# Supplementary material
Source: Springer Nature journal article supplement (https://www.springermedizin.de/resource/supplementary/12885_2007_1060_MOESM3_ESM.pdf/9471004)

**A**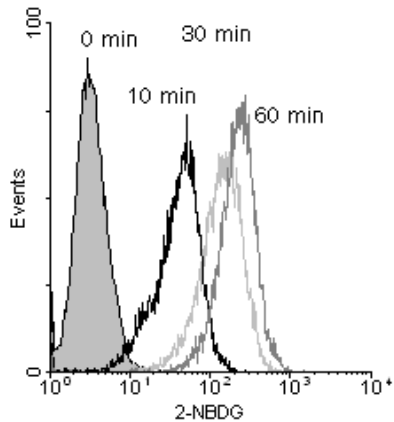**B**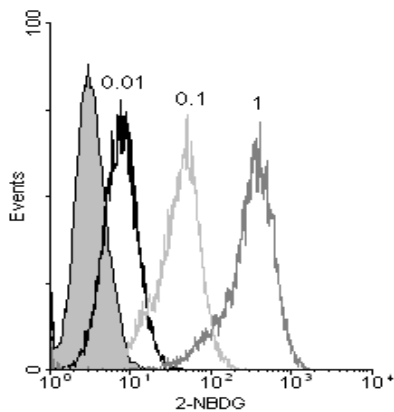**C**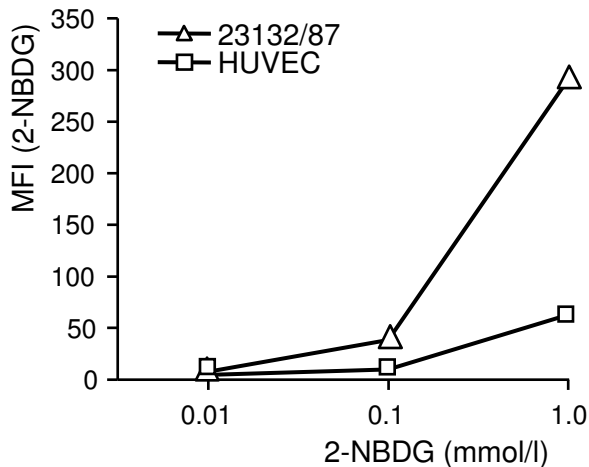**D**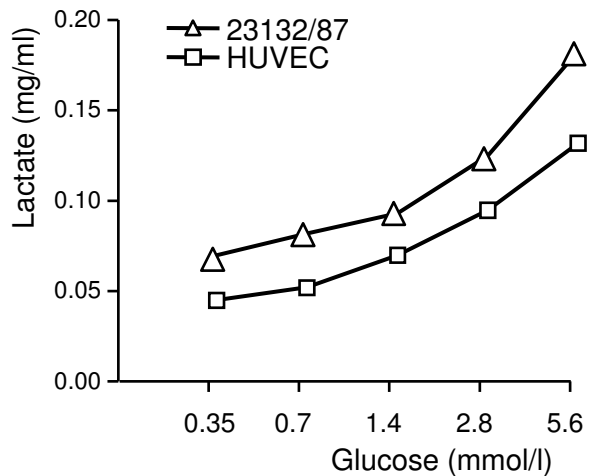

Supplement: MOESM3 [file 9471004]
